# Supplementary material for: The Probiotic Phaeobacter inhibens Provokes Hypertrophic Growth via Activation of the IGF-1/Akt Pathway during the Process of Metamorphosis of Greater Amberjack (Seriola dumerili, Risso 1810)
Source: MDPI journal article supplement (doi:10.3390/ani13132154), 2023-06-29

**Figure S1.** Total bacterial load and presumptive *Vibrios* in seawater from the rearing tanks as determined by counting of colony forming units (CFU) in Marine agar and in TCBS agar, respectively.

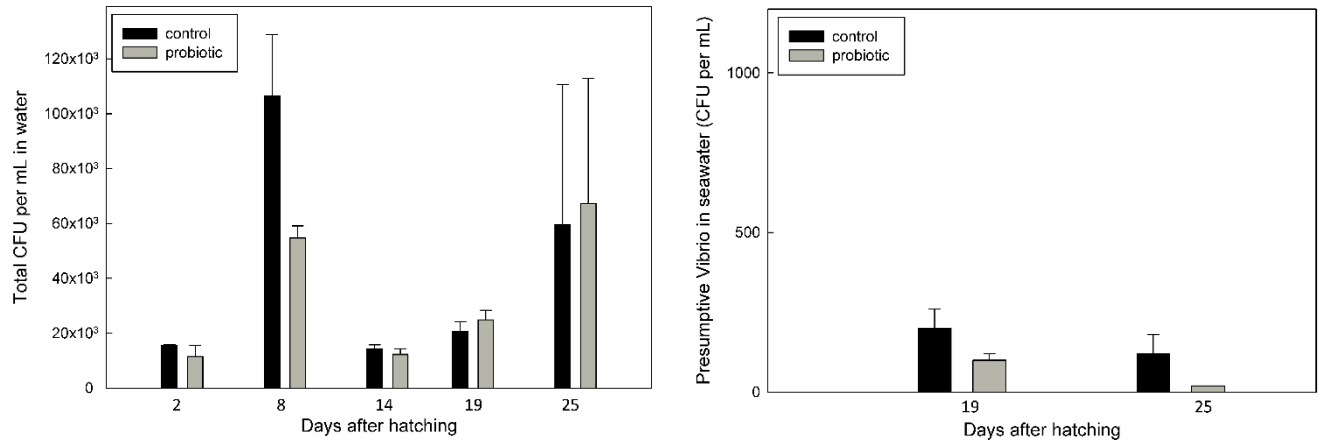

Supplement: s1 [file s1]
